# Supplementary material for: Mosaic upd(14)pat in a patient with mild features of Kagami–Ogata syndrome
Source: PubMed Central journal article supplement (PMC5771875; doi:10.1002/ccr3.1300), 2017-11-28
Supplement: CCR3-6-91-s001.pdf [file CCR3-6-91-s001.pdf]

## **Supplementary Materials**

### **Mosaic UPD(14)pat in a Patient with Mild Features of Kagami-Ogata Syndrome**

**Marte G. Haug,<sup>1</sup> Atle Brendehaug,<sup>2</sup> Gunnar Houge,<sup>2</sup>**

**Masayo Kagami,<sup>3</sup> Tsutomu Ogata<sup>3,4</sup>**

<sup>1</sup> Department of Medical Genetics, St Olav's Hospital, Trondheim, Norway

<sup>2</sup> Department of Medical Genetics, Haukeland University Hospital, Bergen, Norway

<sup>3</sup> Department of Molecular Endocrinology, National Research Institute for Child Health and Development, Tokyo, Japan

<sup>4</sup> Department of Pediatrics, Hamamatsu University School of Medicine, Hamamatsu, Japan.

**Table S1.** Primers utilized in the pyrosequencing analysis.

|                                      | Forward (5' → 3')                                          | Reverse (5' → 3')                                               | Sequence primer                                     | AT | PS  | CN |
|--------------------------------------|------------------------------------------------------------|-----------------------------------------------------------------|-----------------------------------------------------|----|-----|----|
| <i>PLAGL1</i> :alt-TSS-DMR<br>6q24.2 | GGGGTAGTYGTGTTTATAGTTTAG<br>ch6:144329336–144329359        | biotin–CCCAAACACCTACCCTAC<br>ch6:144329214–144329231            | GGGTAGTYGTGTTTATAGTTTAGT<br>ch6:144329335–144329358 | 55 | 146 | 45 |
| <i>PEG10</i> :TSS-DMR<br>7q21.3      | AGAAATTTGATTGYGTTTTGAGGAGAAT<br>chr7:94285716–94285743     | ACCTTTAAAACCTTAATTTCCCCATTTAT<br>chr7:94286028–94286059         | AGTTTGGYGAAAGGTT<br>chr7:94285762–94285777          | 55 | 344 | 45 |
| <i>MEST</i> :alt-TSS-DMR<br>7q32.2   | GTGTGGTTGGYGGTTTTGGGATTA<br>ch7:130132206–130132229        | biotin–ACACCCCCTCCTCAAATA<br>ch7:130132332–130132348            | TGTTTTTGGGYGAAAATTTTAT<br>ch7:130132276–130132297   | 55 | 143 | 45 |
| <i>H19/IGF2</i> :IG-DMR<br>11p15.5   | TTTGGGAGAGTTTGTGAGG<br>chr11:2019763–2019781               | biotin–CCCAAACCRATTCCCATCCAATTA<br>chr11:2019689–2019712        | GRTAATATGYGGTTTTTAGATAGG<br>chr11:2019579–2019603   | 56 | 203 | 45 |
| <i>KCNQ1OT1</i> :TSS-DMR<br>11p15.5  | GGATTTAGAATTAYGATGYGGATTTTA<br>ch11:2720333–2720359        | biotin–TCCCATCTACACCTTATAAACA<br>ch11:2720466–2720487           | TTTTGAATTATTATGAGAATTATAG<br>ch11:2720383–2720407   | 55 | 155 | 45 |
| <i>MEG3/DLKI</i> :IG-DMR<br>14q32.2  | ATTTGGTATTTGTAGTTTTATGTTAAGATG<br>ch14:101275613–101275642 | biotin–AATCAAACAACCTCAAATCCTTTATAAC<br>ch14:101275749–101275776 | AATTGGGTTTGTAGTAG<br>ch14:101275685–101275702       | 54 | 164 | 45 |
| <i>MEG3</i> :TSS-DMR<br>14q32.2      | TTGTGTTTGAATTTATTTTGT<br>ch14:101292170–101292192          | biotin–CCCAAATTCTATAACAAATTACTCT<br>ch14:101292311–101292336    | GTGTTTGAATTTATTTTGT<br>ch14:101292172–101292192     | 54 | 167 | 45 |
| <i>SNURF</i> :TSS-DMR<br>15q11.2     | GGGATATTTGAGATTTTGAAAGAA<br>ch15:25200788–25200813         | biotin–AATACAAAACCTCCCCTACT<br>ch15:25200823–25200837           | GTTATTTTTTTTATTTGGGAGGA<br>ch15:25200880–25200897   | 54 | 110 | 45 |
| <i>GNAS-A/B</i> :TSS-DMR<br>20q13.32 | GGGATATTTGAGATTTTGAAAGAA<br>chr20:57463531–57463555        | biotin–AATACAAAACCTCCCCTACT<br>chr20:57463727–57463746          | GTTATTTTTTTTATTTGGGAGGA<br>chr20:57463630–57463652  | 52 | 217 | 45 |

AT: annealing temperature (°C); PS: product size (bp); CN: cycle numbers; Y: C or T (pyrimidine); and R: A or G (purine).

Physical positions of the primers are based on the NCBI database (Genome Build 37.1).

**Table S2.** The primer sequences and the results of microsatellite analysis.

| Locus           | Position | Forward primer (5' → 3') | Reverse primer (5' → 3') | Mother  | Patient  | Father  | Assessment              |
|-----------------|----------|--------------------------|--------------------------|---------|----------|---------|-------------------------|
| <i>D14S608</i>  | 14q12    | TAAAGGTTTATCCATGCTGTAGC  | ACGTGGTACAGGTAGATAAATGG  | 214/222 | 202/214* | 198/202 | iso-UPD(14)pat (mosaic) |
| <i>D14S63</i>   | 14q23.2  | TTTACTCTCACTGCCCTG       | AATGGTCCAGTCTGCC         | 206     | 206*/210 | 210/216 | iso-UPD(14)pat (mosaic) |
| <i>D14S588</i>  | 14q24.2  | GCCGAAAGAAAGAAAAAAGG     | CGAATGCATACTTGCTGTTG     | 114/118 | 114*/118 | 114/118 | Not informative         |
| <i>D14S258</i>  | 14q24.2  | TCACTGCATCTGGAAGCAC      | CTAACTAAATGGCGAGCATTGAG  | 170/172 | 170*/176 | 170/176 | Not informative         |
| <i>D14S267</i>  | 14q32.12 | TTAATGCCCACTGAATGCT      | AAGGCAGCCCTGGTTT         | 213/219 | 207/213* | 207/215 | iso-UPD(14)pat (mosaic) |
| <i>D14S617</i>  | 14q32.12 | TTTTAGGTGGCCACCATCTA     | CCAGTTTAGGCAACAGAACA     | 141/163 | 141/163* | 141/167 | Not informative         |
| <i>D14S1006</i> | 14q32.2  | TTCCACAGGGCAAGCAGTA      | TTCTGGCAAACCCAACC        | 138/140 | 126/138* | 126     | iso-UPD(14)pat (mosaic) |
| <i>D14S985</i>  | 14q32.2  | CAGTGTGACCTTAAACAAGTCG   | CCTGTGGGGTAGATACACGA     | 128/138 | 128*/134 | 134     | iso-UPD(14)pat (mosaic) |
| <i>D14S292</i>  | 14q32.33 | CTGTGTGGTGCATCAATG       | CATGAAGGCAGCCTCA         | 107/109 | 109      | 109     | Not informative         |
| <i>D14S1007</i> | 14q32.33 | AGCTCCTATATGTCTTCACACAG  | CTCCATTCCCATACGTCC       | 110/122 | 122*/124 | 124     | iso-UPD(14)pat (mosaic) |

The Arabic numbers represent the PCR product sizes in bp.

The *MEG3*/*DLK1* :IG-DMR and *MEG3* :TSS-DMR reside between *D14S985* and *D14S292* .

\* Minor peaks.

A

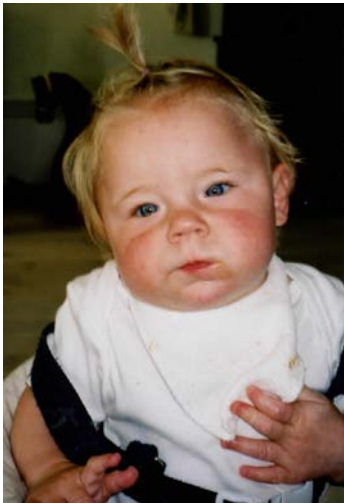

B

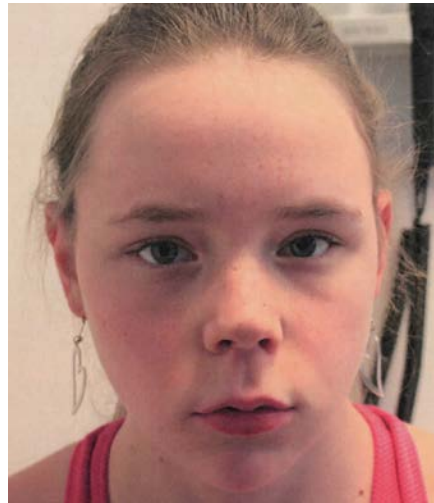

**Fig. S1.** Facial photographs at one year of age (A) and at 13 years of age (B).

## SUPPLEMENTARY NOTE

### Calculation of the ratio of iso-UPD(14)pat cells in leukocytes and buccal cells, using the microsatellite data for *D14S258*

Molecular studies have indicated the presence of cells with isodisomy for whole chromosome 14 and those with biparentally inherited chromosome 14 homologs in this patient. Thus, the genotyping data for *D14S258* argue that the major 176 bp peak is derived from the father and the minor 170 bp is transmitted from the mother (highlighted with red asterisks). In the father who is also heterozygous for the identical two peaks, the area under curve (AUC) is larger for the short 170 bp peak than for the long 176 bp peak. This unequal amplification is consistent with short products being more easily amplified than long products. In the patient, the AUC ratio between the two peaks is obtained as 1.0:6.5 for leukocytes and 1.0:4.9 for buccal cells, after compensation of the unequal amplification between the two peaks using the paternal data.

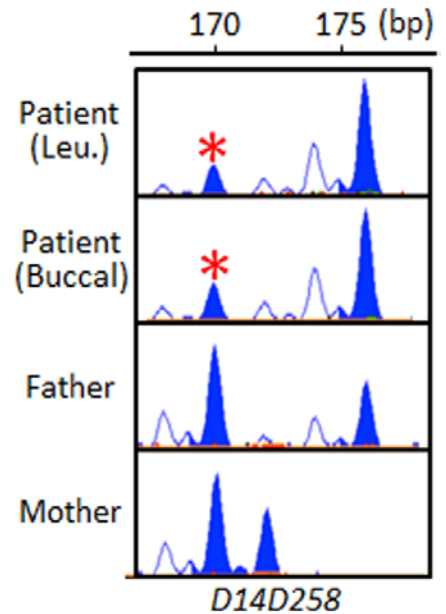

Here, let “X” represent the frequency of the 46,XX,upd(14)pat (isodisomy) cells in leukocytes (thus,  $(1 - X)$  denotes the frequency of normal 46,XX cells in leukocytes). Then, the maternally derived 170 bp peak is generated by one maternally derived chromosome in the normal 46,XX cells, i.e.,  $(1 - X)$ , and the paternally derived 176 bp peak is formed by the products from two paternally derived homologous chromosomes in the 46,XX,upd(14)pat cells and one paternally derived chromosome in the normal 46,XX cells, i.e.,  $(2X + (1 - X)) = (X + 1)$ . Thus, the AUC ratio between the two peaks is represented as  $(1 - X):(X + 1) = 1.0:6.5$ , and “X” is obtained as 0.73 (73%). Similarly, when “Y” represents the frequency of the 46,XX,upd(14)pat cells in salivary cells, “Y” is obtained as 0.66 (66%).
